# Supplementary material for: Chemoresistance of Human Monocyte-Derived Dendritic Cells Is Regulated by IL-17A
Source: PubMed Central journal article supplement (PMC3575476; doi:10.1371/journal.pone.0056865), 2013-02-18
Supplement: pone.0056865.s002.pdf [file pone.0056865.s002.pdf]

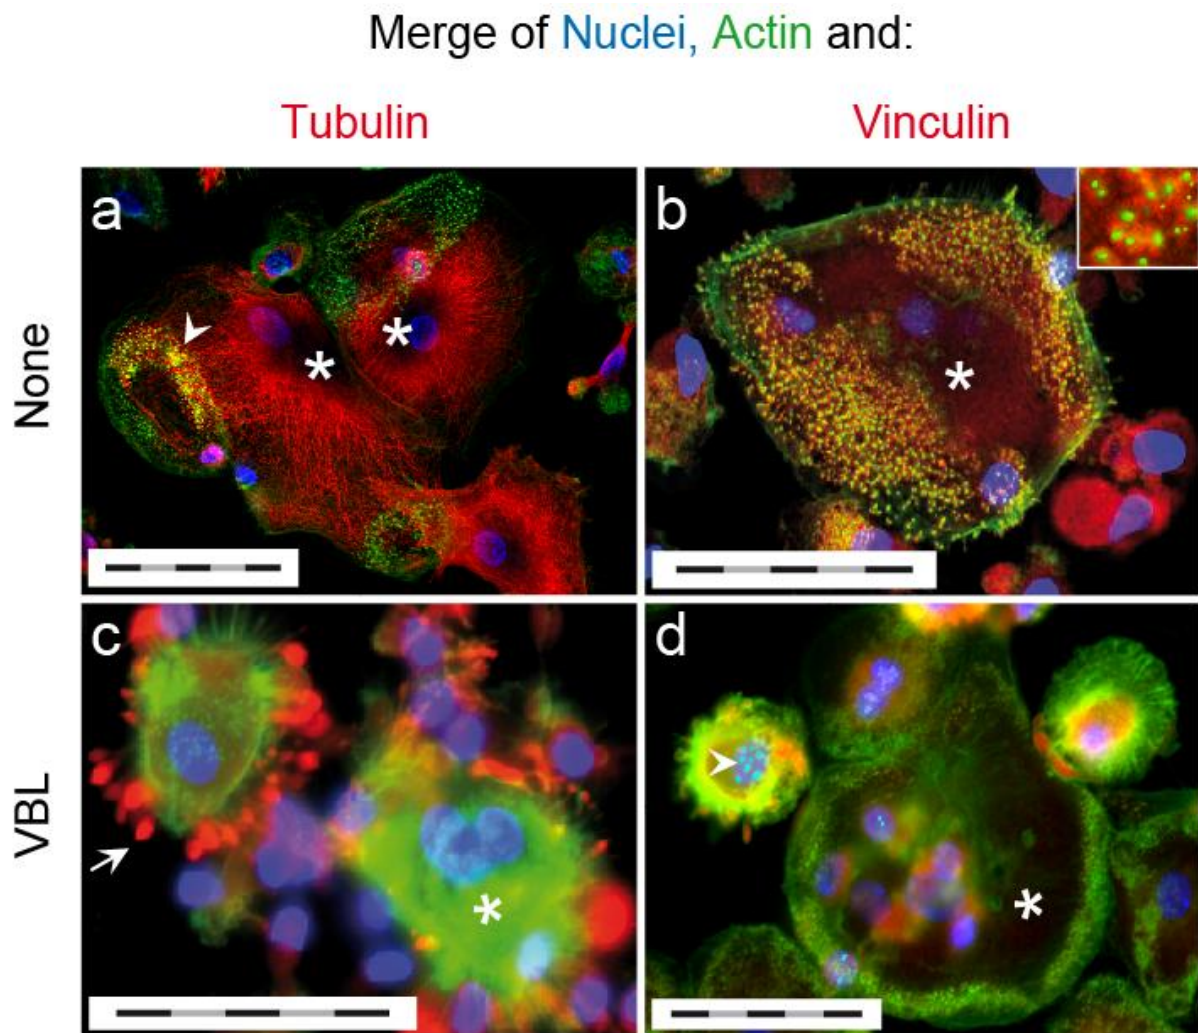

**Figure S2 Result – VBL induces microtubules depolymerisation in IL-17A-induced DC-derived giant cells**

We stained microtubules, actin and nuclei to visualize that cytokines induced a giant microtubule network in giant cells (a) and observed that VBL disorganized the microtubule network (c). Numerous microtubules end in the cell periphery where actin spots are located, and in some cases, yellow color indicates that they directly contact each other (a, arrow-head). Numerous keel-like unpolymerized tubulin-rich structures were budding from the cytoplasm (c, arrow). Podosomes, identified as spot-like actin-rich structures surrounded by a ring of vinculin, formed at the ventral surface of giant cells (b, inset). Lack of podosomes after VBL treatment, illustrates the requirement of an intact microtubule system for podosome assembly (d). Two hours after VBL addition, we identified the first apoptotic nuclei by condensed spots of DNA (d, arrow-head).
