# Supplementary material for: Chemoresistance of Human Monocyte-Derived Dendritic Cells Is Regulated by IL-17A
Source: PubMed Central journal article supplement (PMC3575476; doi:10.1371/journal.pone.0056865), 2013-02-18
Supplement: pone.0056865.s003.pdf [file pone.0056865.s003.pdf]

**Table S1:** Class, name, *in vitro* range and optimal doses to kill IL-17A and IFN- $\gamma$ -stimulated DC, *in vivo* approximate clinical doses of chemotherapy agents

| Class                                        | Abbreviations: name    | <i>In vitro</i> range, optimal dose for killing ( $\mu$ M) | Clinical dose ( $\mu$ M) | Targets                    |
|----------------------------------------------|------------------------|------------------------------------------------------------|--------------------------|----------------------------|
| Glucocorticoid                               | HC : Hydrocortisone    | 0.01-100, no killing                                       | 10                       | Immune system              |
| Glucocorticoid                               | MP: Methylprednisolone | 0.01-100, no killing                                       | 50                       | Immune system              |
| Glucocorticoid                               | P: Prednisolone        | 0.01-100, no killing                                       | 5                        | Immune system              |
| Glucocorticoid                               | BM: Betamethasone      | 0.01-100, no killing                                       | 1                        | Immune system              |
| Glucocorticoid                               | DEX: Dexamethasone     | 0.01-100, no killing                                       | 0.5                      | Immune system              |
| 11 aminoacid cyclic peptide                  | CSA: Cyclosporine A    | 0.008-80, no killing                                       | 0.5                      | Immune system, calcineurin |
| Macrolide                                    | FK-506:Tacrolimus      | 0.0001-1, no killing                                       | 0.02                     | Immune system, calcineurin |
| Purine analogue                              | 2CdA : Cladribine      | 0.00035-3.5, 3                                             | 0.02                     | DNA synthesis              |
| Purine analogue                              | 6-MP: 6-mercaptopurine | 0.05-500, no killing                                       | 5                        | DNA synthesis              |
| Purine analogue                              | FLU: Fludarabine       | 0.01-10, no killing                                        | 5                        | DNA synthesis              |
| Pyrimidine analogue                          | AraC : Cytarabine      | 0.8-800, 40                                                | 14-140                   | DNA synthesis, <i>MCL1</i> |
| Folate acid antagonist                       | MTX: Methotrexate      | 5-5,000, no killing                                        | 1.5-75                   | DNA synthesis              |
| Organometallic complex, purine linker        | CIS: Cisplatin         | 0.17-170, 100                                              | 20                       | DNA synthesis              |
| Alkaloid                                     | ETO:Etoposide          | 0.1-100, no killing                                        | 12                       | Topoisomerase II           |
| Anthracycline antibiotic intercalating agent | DOX: Doxorubicin       | 0.001-10, 1                                                | 0.2                      | Topoisomerase II           |
| Alkaloid                                     | VBL: Vinblastine       | 0.06-60, 0.6                                               | 1.5                      | Microtubule function       |
| Alkaloid                                     | VCR:Vincristine        | 0.0001-1, 1                                                | 0.2                      | Microtubule function       |
